# Supplementary material
Source: PubMed Central journal article supplement (PMC3498926)
Supplement: ismej2011197x5.pdf [file ismej2011197x5.pdf]

Table S4. Species with sequenced genomes that were the closest match with annotated 454 reads from Rothamsted Park Grass soil. Percentage of annotated reads and standard deviation among the 13 pyrosequenced DNA pools that matched with each genome with a similarity at 96% or better and an E value of  $10^{-5}$  or smaller).

| Class                  | Species                                   | Distribution (%) | SD (%)       |
|------------------------|-------------------------------------------|------------------|--------------|
| Alphaproteobacteria    | Bradyrhizobium japonicum USDA 110         | 0.086            | 0.041        |
| Alphaproteobacteria    | Bradyrhizobium sp. BTAi1                  | 0.031            | 0.008        |
| Acidobacteria          | Solibacter usitatus Ellin6076             | 0.022            | 0.009        |
| Alphaproteobacteria    | Rhodopseudomonas palustris BisB18         | 0.019            | 0.006        |
| Gammaproteobacteria    | Pseudomonas fluorescens PfO-1             | 0.013            | 0.010        |
| Alphaproteobacteria    | Nitrobacter hamburgensis X14              | 0.013            | 0.003        |
| Alphaproteobacteria    | Rhodopseudomonas palustris BisA53         | 0.011            | 0.003        |
| Betaproteobacteria     | Burkholderia fungorum                     | 0.009            | 0.008        |
| Alphaproteobacteria    | Rhodopseudomonas palustris BisB5          | 0.008            | 0.002        |
| Gammaproteobacteria    | Pseudomonas fluorescens SBW25             | 0.007            | 0.006        |
| Alphaproteobacteria    | Mesorhizobium loti MAFF303099             | 0.007            | 0.005        |
| Bacteroidetes          | Flavobacterium johnsonia johnsoniae UW101 | 0.007            | 0.018        |
| Alphaproteobacteria    | Nitrobacter winogradskyi Nb-255           | 0.006            | 0.002        |
| Alphaproteobacteria    | Nitrobacter sp. Nb-311A                   | 0.005            | 0.001        |
| Alphaproteobacteria    | Rhodopseudomonas palustris HaA2           | 0.005            | 0.001        |
| Gammaproteobacteria    | Pseudomonas fluorescens Pf-5              | 0.005            | 0.005        |
| Alphaproteobacteria    | Rhizobium leguminosarum bv. viciae 3841   | 0.005            | 0.003        |
| Actinobacteria (class) | Streptomyces avermitilis MA-4680          | 0.005            | 0.006        |
| Acidobacteria          | Acidobacteria bacterium Ellin345          | 0.004            | 0.003        |
| Alphaproteobacteria    | Rhodopseudomonas palustris CGA009         | 0.004            | 0.001        |
|                        | <b>Total 20 first detected species</b>    | <b>0.273</b>     | <b>0.070</b> |
|                        | <b>Total annotated sequences</b>          | <b>0.354</b>     | <b>0.089</b> |
