# Supplementary material
Source: PubMed Central journal article supplement (PMC3498926)
Supplement: ismej2011197x6.pdf [file ismej2011197x6.pdf]

Table S5. Newbler assembler results for the ten independent runs using randomly selected reads from the total of 13 pyrosequencing runs for DNA extracted from soil from the Park Grass experiment plot 3d at Rothamsted Research. Newbler parameters: Expected depth: 0 (i.e. undefined); Minimum read length: 20; Seed step : 12; Seed length : 16; Seed Count : 1; Minimum overlap length : 40; Minimum overlap identity : 90%; Alignment identity score: 2; Alignment difference score: -3.

| <b>Assembler runs:</b>    | <b>1</b>  | <b>2</b>  | <b>3</b>   | <b>4</b>   | <b>5</b>   | <b>6</b>  | <b>7</b>   | <b>8</b>   | <b>9</b>   | <b>10</b>  |
|---------------------------|-----------|-----------|------------|------------|------------|-----------|------------|------------|------------|------------|
| <b>runMetrics</b>         |           |           |            |            |            |           |            |            |            |            |
| totalNumberOfReads        | 1257242   | 2514489   | 3771729    | 5028954    | 6286181    | 7543423   | 8800651    | 10057895   | 11315094   | 12572342   |
| totalNumberOfBases        | 487554794 | 974670636 | 1461941647 | 1949323461 | 2436671088 | 2.924E+09 | 3411376290 | 3898801814 | 4386462616 | 4874169257 |
| <b>Reads Status</b>       |           |           |            |            |            |           |            |            |            |            |
| numAlignedReads           | 57556     | 185373    | 352696     | 554010     | 788063     | 1048430   | 1330404    | 1634721    | 1959374    | 2303182    |
| numAlignedBases           | 18266373  | 59672888  | 114246594  | 180909939  | 259220082  | 346814643 | 442802556  | 547016473  | 658672541  | 777402244  |
| inferredReadError         | 5.06%     | 5.35%     | 5.43%      | 5.42%      | 5.36%      | 5.31%     | 5.24%      | 5.17%      | 5.11%      | 5.05%      |
| numberAssembled           | 31175     | 104814    | 200774     | 319201     | 459853     | 620159    | 798751     | 994756     | 1206256    | 1432866    |
| numberPartial             | 26381     | 80500     | 151773     | 234651     | 328066     | 427926    | 531532     | 639829     | 752966     | 870034     |
| numberSingleton           | 1163529   | 2236204   | 3260115    | 4244122    | 5192433    | 6112877   | 7011630    | 7884093    | 8738366    | 9572485    |
| numberRepeat              | 21        | 103       | 268        | 408        | 763        | 1146      | 1548       | 1968       | 2487       | 3074       |
| numberOutlier             | 30890     | 82472     | 143156     | 209757     | 278972     | 350046    | 420777     | 495652     | 568277     | 642021     |
| numberTooShort            | 5246      | 10396     | 15643      | 20815      | 26094      | 31269     | 36413      | 41597      | 46742      | 51862      |
| Total                     | 1257242   | 2514489   | 3771729    | 5028954    | 6286181    | 7543423   | 8800651    | 10057895   | 11315094   | 12572342   |
| <b>largeContigMetrics</b> |           |           |            |            |            |           |            |            |            |            |
| numberOfContigs           | 3702      | 9138      | 17233      | 27641      | 40104      | 53850     | 68470      | 84705      | 101154     | 118800     |
| numberOfBases             | 3757449   | 9786251   | 17197015   | 26537742   | 37785216   | 50417029  | 64287965   | 79618149   | 95770632   | 113089732  |
| avgContigSize             | 1014      | 1070      | 997        | 960        | 942        | 936       | 938        | 939        | 946        | 951        |
| N50ContigSize             | 1076      | 1094      | 998        | 964        | 951        | 949       | 954        | 956        | 965        | 971        |
| largestContigSize         | 6361      | 15448     | 22645      | 21204      | 14380      | 15875     | 13912      | 15752      | 15426      | 15425      |
| Q40PlusBases              | 3208918   | 8414019   | 14785259   | 22817145   | 32526441   | 43456627  | 55545708   | 68928952   | 83085358   | 98268346   |
| Q39MinusBases             | 548531    | 1372232   | 2411756    | 3720597    | 5258775    | 6960402   | 8742257    | 10689197   | 12685274   | 14821386   |

Table S5. Newbler assembler results for the ten independent runs using randomly selected reads from the total of 13 pyrosequencing runs for DNA extracted from soil from the Park Grass experiment plot 3d at Rothamsted Research. Newbler parameters: Expected depth: 0 (i.e. undefined); Minimum read length: 20; Seed step : 12; Seed length : 16; Seed Count : 1; Minimum overlap length : 40; Minimum overlap identity : 90%; Alignment identity score: 2; Alignment difference score: -3.

| <b>Assembler runs:</b>  | <b>1</b> | <b>2</b> | <b>3</b> | <b>4</b> | <b>5</b> | <b>6</b> | <b>7</b> | <b>8</b>  | <b>9</b>  | <b>10</b> |
|-------------------------|----------|----------|----------|----------|----------|----------|----------|-----------|-----------|-----------|
| <b>allContigMetrics</b> |          |          |          |          |          |          |          |           |           |           |
| numberOfContigs         | 7478     | 21418    | 41388    | 65598    | 94069    | 124842   | 157780   | 192206    | 228651    | 266600    |
| numberOfBases           | 4738744  | 12993575 | 23467908 | 36508692 | 51965915 | 69162343 | 87893864 | 108053114 | 129548168 | 152337226 |
| <b>alignmentDepths</b>  |          |          |          |          |          |          |          |           |           |           |
| 1                       | 254115   | 562821   | 1047133  | 1689799  | 2431319  | 3210275  | 4011784  | 4837438   | 5731987   | 6632746   |
| 2                       | 1203570  | 3072382  | 5787534  | 9165657  | 13092802 | 17334645 | 21793710 | 26405044  | 31238812  | 36348350  |
| 3-4                     | 2093933  | 4747497  | 8409968  | 13474365 | 19616431 | 26379378 | 33651362 | 41544235  | 49746108  | 58339992  |
| 5-6                     | 1110246  | 2960407  | 4631690  | 6921263  | 9876485  | 13396813 | 17371792 | 21667238  | 26454007  | 31525166  |
| 7-8                     | 332199   | 1556836  | 2402579  | 3184272  | 4289997  | 5675685  | 7371741  | 9243575   | 11315472  | 13600152  |
| 9-10                    | 94034    | 788301   | 1541061  | 1954878  | 2376906  | 2973868  | 3721430  | 4618985   | 5621952   | 6710813   |
| 11-13                   | 36453    | 424071   | 1292575  | 1901405  | 2252372  | 2648259  | 3078596  | 3676553   | 4324585   | 5059861   |
| 14-16                   | 10742    | 116673   | 520348   | 1113087  | 1457370  | 1641430  | 1849416  | 2092694   | 2379250   | 2673058   |
| 17-19                   | 5515     | 40973    | 174771   | 542959   | 932733   | 1128344  | 1237370  | 1340651   | 1458570   | 1609141   |
| 20-22                   | 2440     | 15876    | 63147    | 213932   | 537004   | 812516   | 931154   | 964149    | 988136    | 1061923   |
| 23-25                   | 1773     | 6433     | 30899    | 84046    | 248247   | 499440   | 695566   | 770823    | 781784    | 791998    |
| 26-28                   | 1125     | 4689     | 16783    | 39095    | 108385   | 257508   | 463531   | 605929    | 674295    | 663610    |
| 29-31                   | 893      | 3213     | 7901     | 21079    | 46572    | 120284   | 254402   | 431273    | 544012    | 592207    |
| 32-34                   | 471      | 2465     | 4487     | 12294    | 27656    | 56103    | 127353   | 254512    | 396612    | 484982    |
| 35-38                   | 291      | 1395     | 3732     | 9901     | 19892    | 41132    | 78045    | 164154    | 303232    | 460025    |
| 39-42                   | 200      | 1135     | 2169     | 4596     | 11067    | 21353    | 36487    | 68246     | 143552    | 263660    |
| 43-46                   | 50       | 1150     | 1570     | 3449     | 5774     | 13134    | 21329    | 36671     | 65517     | 123733    |
| 47-50                   | 132      | 451      | 1102     | 1567     | 3299     | 7786     | 15037    | 21567     | 31831     | 58094     |
| 51-55                   | 304      | 367      | 942      | 1408     | 2421     | 4825     | 11218    | 16476     | 25135     | 37157     |
| 56-60                   | 90       | 323      | 517      | 1117     | 1235     | 3105     | 5834     | 11695     | 17448     | 24615     |
| 61-70                   | 10       | 368      | 486      | 1510     | 2142     | 3085     | 4382     | 10797     | 20884     | 28372     |
| 71-80                   | 6        | 383      | 282      | 722      | 1350     | 1875     | 2397     | 4266      | 8248      | 13665     |

Table S5. Newbler assembler results for the ten independent runs using randomly selected reads from the total of 13 pyrosequencing runs for DNA extracted from soil from the Park Grass experiment plot 3d at Rothamsted Research. Newbler parameters: Expected depth: 0 (i.e. undefined); Minimum read length: 20; Seed step : 12; Seed length : 16; Seed Count : 1; Minimum overlap length : 40; Minimum overlap identity : 90%; Alignment identity score: 2; Alignment difference score: -3.

| <b>Assembler runs:</b> | <b>1</b> | <b>2</b> | <b>3</b> | <b>4</b> | <b>5</b> | <b>6</b> | <b>7</b> | <b>8</b> | <b>9</b> | <b>10</b> |
|------------------------|----------|----------|----------|----------|----------|----------|----------|----------|----------|-----------|
| 91-100                 | 0        | 102      | 191      | 245      | 406      | 670      | 1227     | 1460     | 1770     | 2513      |
| 101-140                | 0        | 15       | 942      | 580      | 508      | 1155     | 2609     | 4075     | 3786     | 5084      |
| 141-180                | 0        | 0        | 0        | 1068     | 699      | 313      | 291      | 892      | 1964     | 2207      |
| 181-240                | 0        | 0        | 0        | 41       | 676      | 814      | 406      | 463      | 500      | 921       |
| 241-300                | 0        | 0        | 0        | 0        | 12       | 500      | 981      | 606      | 469      | 400       |
| 301-400                | 0        | 0        | 4        | 0        | 0        | 3        | 33       | 652      | 1063     | 1178      |
| 401-500                | 0        | 0        | 20       | 0        | 0        | 7        | 1        | 1        | 15       | 84        |
| 501-600                | 8        | 0        | 5        | 0        | 1        | 5        | 0        | 0        | 12       | 4         |
| 601-700                | 0        | 0        | 1        | 0        | 0        | 1        | 0        | 0        | 1        | 2         |
| 701-850                | 0        | 0        | 0        | 0        | 0        | 3        | 0        | 0        | 5        | 10        |
| 851-1000               | 0        | 0        | 0        | 0        | 0        | 9        | 0        | 0        | 0        | 14        |
| 1001+                  | 0        | 20       | 23       | 26       | 13       | 23       | 29       | 16       | 26       | 38        |

Read Status – status of the read in the assembly, which can be one of the following:

- a. Assembled – the read is fully incorporated into the assembly
- b. PartiallyAssembled – only part of the read was included in the assembly, the rest was deemed to have diverged sufficiently to not be included
- c. Singleton – the read did not overlap with any other reads in the input
- d. Repeat – the read was either:
  - i. Inferred to be repetitive early in the assembly process. A read can be inferred to be repetitive if >70% of the read's seeds hit to at least 70 other reads. Such reads are excluded from the assembly.
  - ii. Determined to partially overlap a contig. The portions of such reads that overlap unique contigs are still included in the assembly results.
- e. Outlier – the read was identified by the GS De Novo Assembler as problematic, and was excluded from the final contigs (one explanation of these outliers are chimeric sequences, but sequences may be identified as outliers simply as an assembler artifact)
- f. TooShort – the trimmed read was too short to be used in the computation (shorter than 50 bases and longer than the value of the minlen parameter, unless 454 Paired End Reads are included in the dataset, in which case, all reads at least “minlen” bases are used).
